# Supplementary material for: Pencil-on-paper flexible DBD plasma for surface disinfection
Source: Royal Society of Chemistry journal article supplement (doi:10.1039/d3ma01122d), 2024-01-01
Supplement: d3ma01122d1.pdf [file d3ma01122d1.pdf]

## Pencil-on-paper flexible DBD plasma for surface disinfection

Neha Kaushik,<sup>†a,b</sup> Thuan Nguyen Dao,<sup>†c</sup> Minh Thu Nguyen,<sup>c</sup> Shweta B. Borkar,<sup>a</sup> Hoang Tung Nguyen,<sup>c</sup> Le Thi Quynh Xuan,<sup>c</sup> Tirtha Raj Acharya,<sup>a</sup> Thanh Tung Nguyen,<sup>c</sup> Eun Ha Choi,<sup>c</sup> Nagendra Kumar Kaushik<sup>\*a</sup> and Linh Nhat Nguyen<sup>\*c</sup>

<sup>a</sup>Plasma Bioscience Research Center, Department of Electrical and Biological Physics, Kwangwoon University, Seoul 01897, Republic of Korea. Email: kaushik.nagendra@kw.ac.kr

<sup>b</sup>Department of Biotechnology, College of Engineering, The University of Suwon, Hwaseong 18323, Republic of Korea.

<sup>c</sup>Laboratory of Plasma Technology, Institute of Materials Science, Vietnam Academy of Science and Technology, 18 Hoang Quoc Viet, Cau Giay, Hanoi. Email: linhnn@ims.vast.ac.vn

<sup>†</sup>NK and TND contributed equally to this work.

1. The sheet conductivity of the pencil trace measured by a Keithley 4200 SCS Parameter analyzer connected to a four-point probe. The

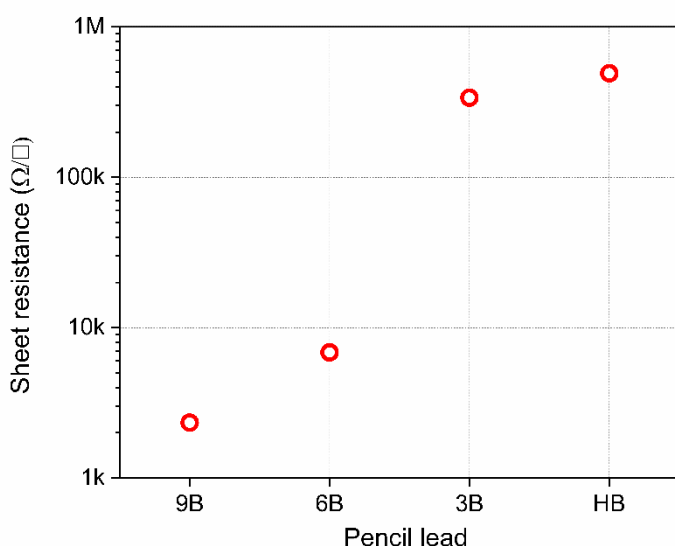

Figure S1: Sheet resistance of different pencil lead types.

## 2. SEM cross-section of the PoP plasma device

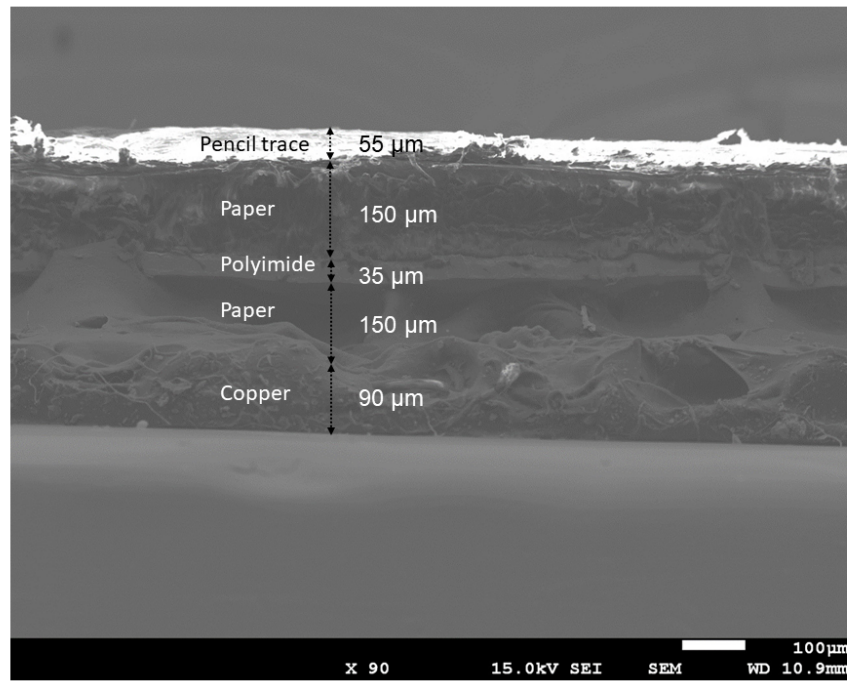

*Figure S2: SEM cross-section image of the PoP plasma device reveals the thickness of each component layer.*
